# Supplementary material for: Several methods for assessing research waste in reviews with a systematic search: a scoping review
Source: PeerJ journal article supplement (doi:10.7717/peerj.18466), 2024-11-18
Supplement: Visual_abstract_methods.pdf [file Visual_abstract_methods.pdf]

# How do systematic reviews, scoping reviews, and overviews of reviews examine research waste?

## METHODS

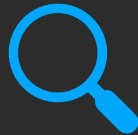

**SCOPING REVIEW**  
Of the databases  
Pubmed and Embase

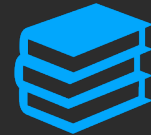

## RESULTS

**93** Reviews with a systematic search were included

**49** methods + **33** descriptive

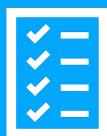

**54%** of the reviews examine for methodological research waste

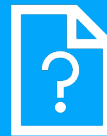

**45%** of the reviews examine for underreported research waste

## IMPLICATIONS

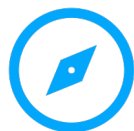

This review guides researchers in selecting methodologies and contributes to the ongoing discourse on optimizing research efficiency
